# Supplementary material for: Using Targeted Active-Learning Exercises and Diagnostic Question Clusters to Improve Students' Understanding of Carbon Cycling in Ecosystems
Source: Atypon-hosted journal article supplement (doi:10.1187/cbe.11-02-0011), 2012-03-01
Supplement: combinedsupmats1.pdf [file combinedsupmats1.pdf]

**Supplemental Material 1. Details of the diagnostic questions<sup>1</sup> and their corresponding in-class activities.**

| DQC Question Number & Topic                              | Biological Processes Assessed                           | Targeted active-learning activities                                                                                                                                                                                                                                                                                                                                                                                                                                                                                     |
|----------------------------------------------------------|---------------------------------------------------------|-------------------------------------------------------------------------------------------------------------------------------------------------------------------------------------------------------------------------------------------------------------------------------------------------------------------------------------------------------------------------------------------------------------------------------------------------------------------------------------------------------------------------|
| 1 – Seasonal fluctuation of atmospheric CO <sub>2</sub>  | Photosynthesis<br>Biosynthesis<br>Respiration in plants | <u>Global Climate Change Graphs</u> – Students work in small groups interpreting several IPCC figures, including the Keeling curve, and respond to discussion questions (1-AL and 2-AL,).                                                                                                                                                                                                                                                                                                                               |
| 2 – Cellular respiration as C source in decomposers      | Cellular respiration in decomposers                     | <u>Cow Graphs</u> – Students work in small groups interpreting two bar graphs showing the amount of carbon in different components of the ecosystem through time with carbon originating from a dead cow. Followed by whole class discussion (Figure 1) (1-AL, 2-AL, 3-MAL).<br><br><u>Tracing Carbon</u> – Students are given a "you are a carbon atom" scenario and asked to follow the C from the air to a variety of destinations, discussing the processes the atom experiences along the way (1-AL, 2-AL, 3-MAL). |
| 3 - Photosynthesis as C sink                             | Photosynthesis                                          | <u>Cow Graphs</u> (see above)<br><br><u>Ecosphere Problem Tasks</u> – Students solve a set of data-rich problems that prompt students to reason both qualitatively and quantitatively about the role of producers, consumers, and decomposers in the cycling of matter and flow of energy in a small enclosed ecosystem (two hour activity, See Maskiewicz, 2006). (1-AL)                                                                                                                                               |
| 4 – Cellular respiration and biosynthesis in decomposers | Cellular respiration in decomposers<br><br>Biosynthesis | <u>Mold Graph</u> – Students work in small groups to interpret a graph showing the change in mass of a piece of fruit and mold and discussion questions (2-AL)<br><br><u>Ecosphere Problem Tasks</u> (see above)                                                                                                                                                                                                                                                                                                        |
| 5 – Photosynthesis and biosynthesis in plants            | Photosynthesis<br>Biosynthesis                          | <u>Carbon from soil</u> – Students work in small groups interpreting a graph showing change in mass of potted plant (dry weight) and soil with discussion questions (2-AL).<br><br><u>Classic Plant Experiments</u> – Students work in small groups making predictions for and then reasoning about famous classic plant experiments conducted by researchers such as von Helmont, Woodward, and Priestley (Rabinowitch, 1971) (1-AL).                                                                                  |
| 6 – C released by cellular respiration in plants         | Cellular respiration in plants                          | <u>Ecosystem diagram</u> – students draw arrows representing sources and sinks of carbon (2-AL).<br><br><u>Classic Plant Experiments</u> (see above)                                                                                                                                                                                                                                                                                                                                                                    |
| 7 – C source for biosynthesis in carnivore               | Digestion, biosynthesis, & respiration in animals       | <u>Whale-krill-phytoplankton</u> tropic level exercise (e.g. students reason about how much carbon in a whale comes from phytoplankton) (2-AL)<br><br><u>Coal Box Diagrams</u> – students complete box and arrow diagrams determining, for example, where the carbon in coal originates (1-AL, 2-AL, 3-MAL).                                                                                                                                                                                                            |

<sup>1</sup> The questions were selected from two DQC sets, Keeling Curve (1) and Grandma Johnson (2-7), both available at <http://www.biodqc.org>. Hartley *et al.*, (2011), explain that these questions test students' understanding of generative, transformative, and oxidative biological processes across two or more scales of biological organization.
